# Supplementary material for: Evidence for an FMR1 mRNA Gain-Of-Function Toxicity Mechanism in the Pathogenesis of Fragile-X Associated Premature Ovarian Insufficiency
Source: Research Square preprint supplement (doi:10.21203/rs.3.rs-904337/v1), 2021-09-28
Supplement: Supplementary file 1 [file 8ed07d8763bbd314c39a3057.xlsx]

## Sheet: RP-SMS results
Gene Symbol	Occurrences	Present in
ALYREF	4	S1, S2, S3, S4
CNBP	4	S1, S2, S3, S4
DDX5	4	S1, S2, S3, S4
DHX9	4	S1, S2, S3, S4
G3BP1	4	S1, S2, S3, S4
G3BP2	4	S1, S2, S3, S4
ILF3	4	S1, S2, S3, S4
NCL	4	S1, S2, S3, S4
NPM1	4	S1, S2, S3, S4
RBM14	4	S1, S2, S3, S4
RPL26	4	S1, S2, S3, S4
RPL35	4	S1, S2, S3, S4
RPL36A-HNRNPH2	4	S1, S2, S3, S4
RPS17	4	S1, S2, S3, S4
SNRP70;SNRNP70	4	S1, S2, S3, S4
SRSF1	4	S1, S2, S3, S4
SRSF2	4	S1, S2, S3, S4
SRSF3	4	S1, S2, S3, S4
SRSF6	4	S1, S2, S3, S4
SRSF7	4	S1, S2, S3, S4
CAPRIN1	3	S1, S2, S3
DDX17	3	S1, S2, S3
DHX36	3	S2, S3, S4
EEFSEC	3	S1, S3, S4
EIF2AK2	3	S1, S2, S3
FAU	3	S1, S2, S4
FUS	3	S1, S2, S3
HEL-S-70p;ATIC	3	S2, S3, S4
HNRNPH1	3	S2, S3, S4
HNRNPH2	3	S2, S3, S4
HNRPH3;HNRNPH3	3	S1, S2, S3
ILF2	3	S1, S2, S3
LSM14A	3	S1, S3, S4
LYAR	3	S1, S3, S4
MBLL;MBNL2;MBNL1;MBNL3	3	S2, S3, S4
PA2G4	3	S2, S3, S4
PUF60	3	S2, S3, S4
RBM3	3	S1, S2, S3
RPL19	3	S1, S2, S3
RPL23A	3	S1, S2, S3
RPL27	3	S1, S2, S4
RPS19	3	S1, S2, S3
RPS7	3	S1, S2, S3
SFPQ	3	S2, S3, S4
SFRS5;SRSF5	3	S2, S3, S4
TAF15	3	S1, S3, S4
XAB2	3	S1, S2, S4
ZNF787	3	S1, S3, S4
AGRN	2	S1, S2
ASNS	2	S1, S2
Adenosine deaminase	2	S3, S4
C7orf50;MGC11257	2	S3, S4
C9orf88;FAM129B	2	S1, S2
CDKN2A	2	S1, S3
COL18A1	2	S1, S2
CSA2;IK	2	S1, S2
CTCF	2	S3, S4
DDX27	2	S3, S4
DDX56	2	S3, S4
DHX30	2	S3, S4
DHX37	2	S3, S4
DKC1	2	S3, S4
DLST	2	S1, S2
DPYSL3	2	S2, S3
EIF2B4	2	S2, S3
EIF2S1	2	S3, S4
EIF2S3;EIF2S3L	2	S3, S4
EWSR1	2	S2, S3
FSCN1	2	S3, S4
GRSF1	2	S3, S4
GTF2I	2	S1, S2
HEL-S-14;CNN1	2	S1, S2
HEL-S-39;PPIB	2	S1, S3
HEL113;VIM	2	S1, S2
HNRNPAB	2	S1, S4
HNRNPDL;HNRPDL	2	S3, S4
HNRPF;HNRNPF	2	S3, S4
IGHMBP2	2	S1, S3
LDHB	2	S1, S2
NAA15;NARG1	2	S1, S2
NAT10	2	S3, S4
NELFA;WHSC2	2	S1, S2
NSUN2	2	S3, S4
NXF1	2	S3, S4
PARVA	2	S3, S4
PBRM1;PB1	2	S3, S4
PHF6	2	S3, S4
PRRC2A	2	S3, S4
RAD50	2	S1, S2
RNA-specific isoform ADAR-a variant (Fragment)	2	S3, S4
RPL22	2	S1, S2
RPL29	2	S1, S2
RPL38	2	S3, S4
RPS14	2	S2, S4
RPS15	2	S3, S4
SCAF11	2	S2, S3
SERBP1	2	S3, S4
SNRPD1	2	S1, S3
SRP14	2	S1, S3
SRP9	2	S3, S4
SRSF4;SFRS4	2	S1, S3
SRSF9	2	S3, S4
TRA2B	2	S3, S4
UBAP2L	2	S2, S3
UBE2M	2	S1, S2
USP10	2	S3, S4
UTP6	2	S3, S4
XRN2	2	S3, S4
YBX1	2	S1, S2
ZFP91-CNTF	2	S3, S4
ZNF629	2	S1, S3
